# Supplementary material for: Early B Cell Factor Activity Controls Developmental and Adaptive Thermogenic Gene Programming in Adipocytes
Source: PubMed Central journal article supplement — Cell Rep. Author manuscript; Available in PMC 2020 Mar 18. (PMC7079313; doi:10.1016/j.celrep.2020.02.023), 2020-03-03
Supplement: NIHMS1571424-supplement-1.pdf [file NIHMS1571424-supplement-1.pdf]

**Cell Reports, Volume 30**

## **Supplemental Information**

### **Early B Cell Factor Activity Controls**

### **Developmental and Adaptive Thermogenic**

### **Gene Programming in Adipocytes**

**Anthony R. Angueira, Suzanne N. Shapira, Jeff Ishibashi, Samay Sampat, Jaimarie Sostre-Colón, Matthew J. Emmett, Paul M. Titchenell, Mitchell A. Lazar, Hee-Woong Lim, and Patrick Seale**

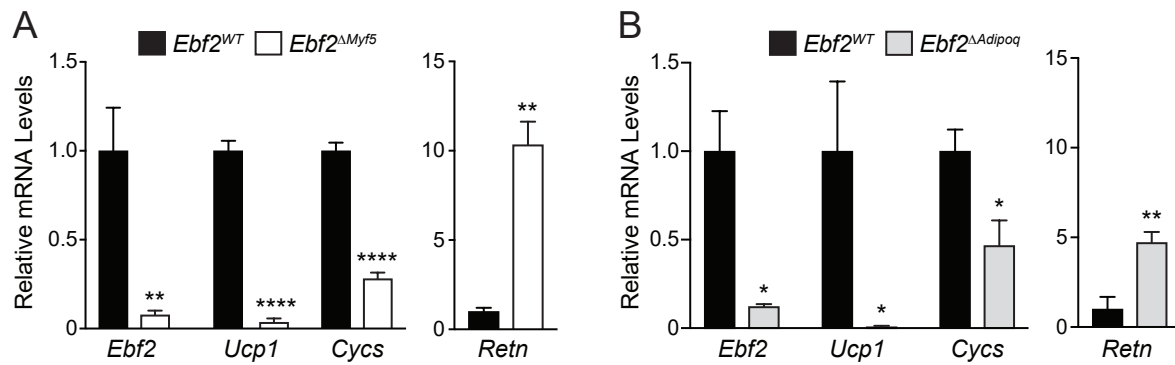

**Figure S1. Adipocyte-EBF2 controls thermogenic gene expression during BAT development (Related to Fig.1)**

**A, B)** Relative mRNA levels of *Ebf2*, brown fat genes (*Ucp1*, *Cyts*) and the white adipocyte marker *Retn* in embryonic BAT (E17-E19) from: **(A)** *Ebf2*<sup>WT</sup> and *Ebf2*<sup>ΔMyf5</sup>; and **(B)** *Ebf2*<sup>WT</sup> and *Ebf2*<sup>ΔAdipoq</sup> mice. (n= 3-6 mice per group; Mean±SEM).

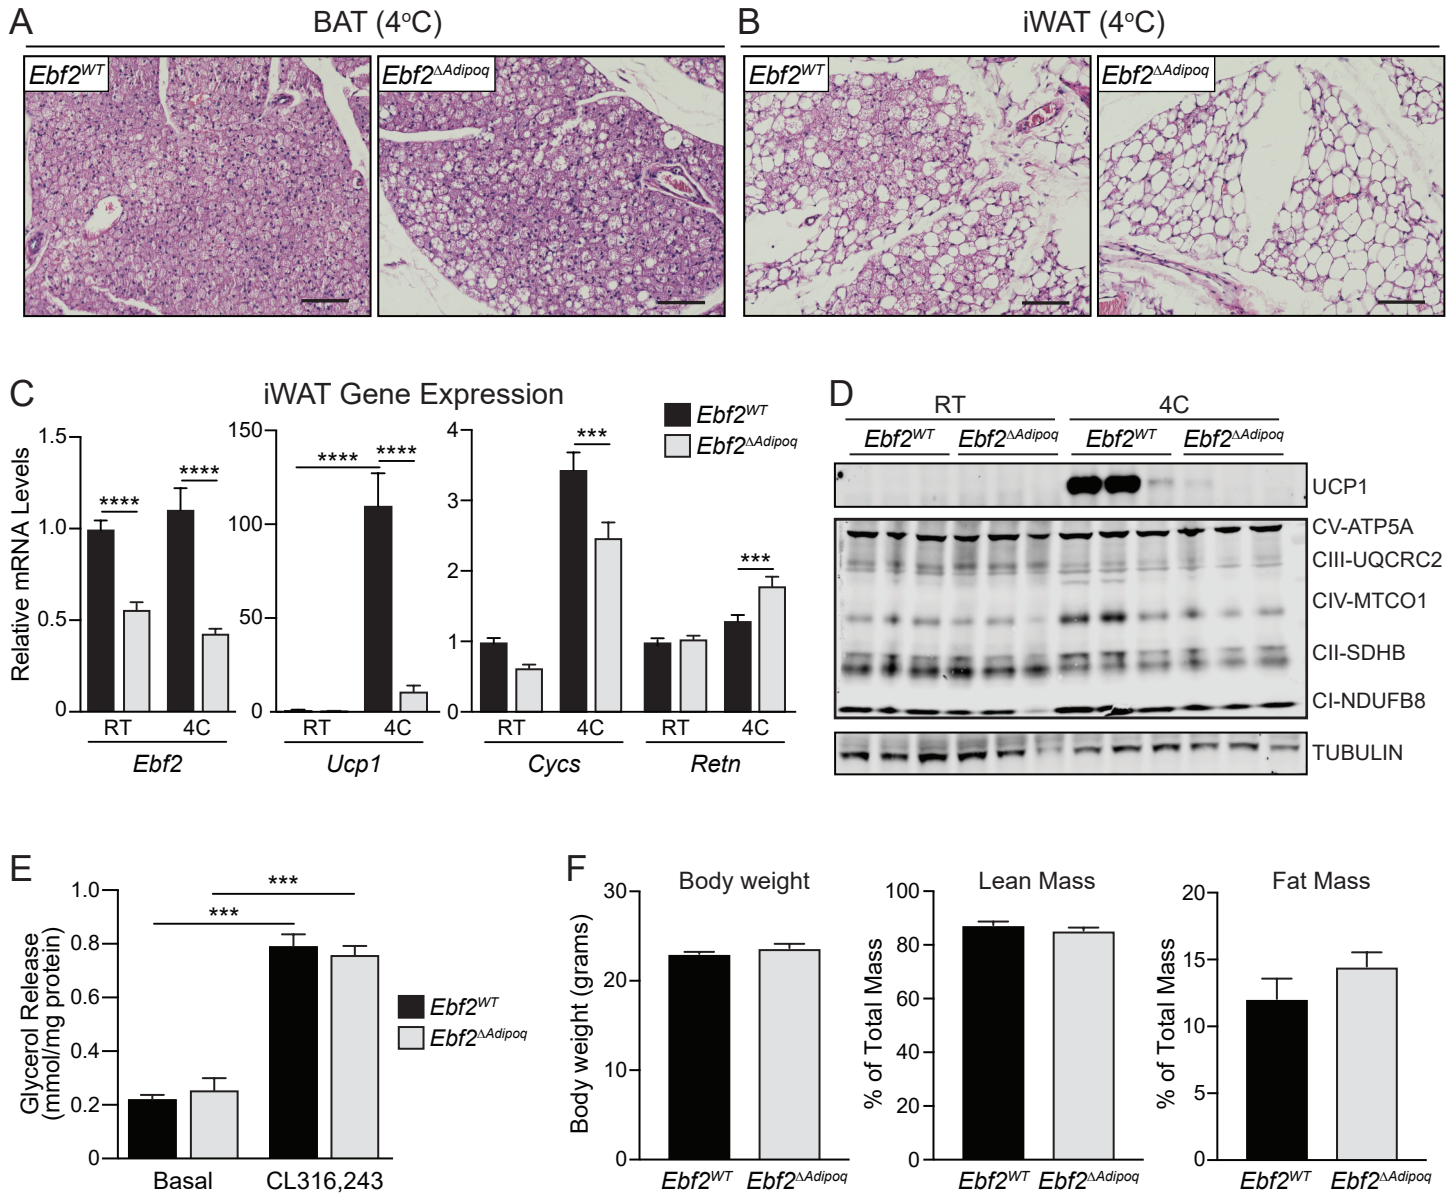

**Figure S2. EBF2 is required for cold-induced beiging of inguinal WAT (Related to Fig. 2).**

**A,B** Hematoxylin and eosin staining of BAT (**A**) and inguinal WAT (iWAT, **B**) from *Ebf2*<sup>WT</sup> and *Ebf2*<sup>ΔAdipoq</sup> mice following exposure to 4°C for 1 week (Scale Bar=100 μm).

**C** Relative mRNA levels of *Ebf2*, brown fat genes (*Ucp1*, *Cysc*) and the white adipocyte marker *Retn* in iWAT from *Ebf2*<sup>WT</sup> and *Ebf2*<sup>ΔAdipoq</sup> mice housed at room temperature (RT) or following cold exposure (4°C) for 1 week (n=9-11 mice per group; Mean±SEM).

**D** Western Blot analysis of UCP1 and mitochondrial respiratory chain components in iWAT from *Ebf2*<sup>WT</sup> and *Ebf2*<sup>ΔAdipoq</sup> mice housed at RT or exposed to 4°C for 1 week.

**E** Glycerol release (lipolysis) from eWAT of *Ebf2*<sup>WT</sup> (n=4) and *Ebf2*<sup>ΔAdipoq</sup> (n=6) mice (Mean±SEM).

**F** Body weight and composition (NMR) of *Ebf2*<sup>WT</sup> (n=4) and *Ebf2*<sup>ΔAdipoq</sup> (n=6) housed at RT (Mean±SEM).

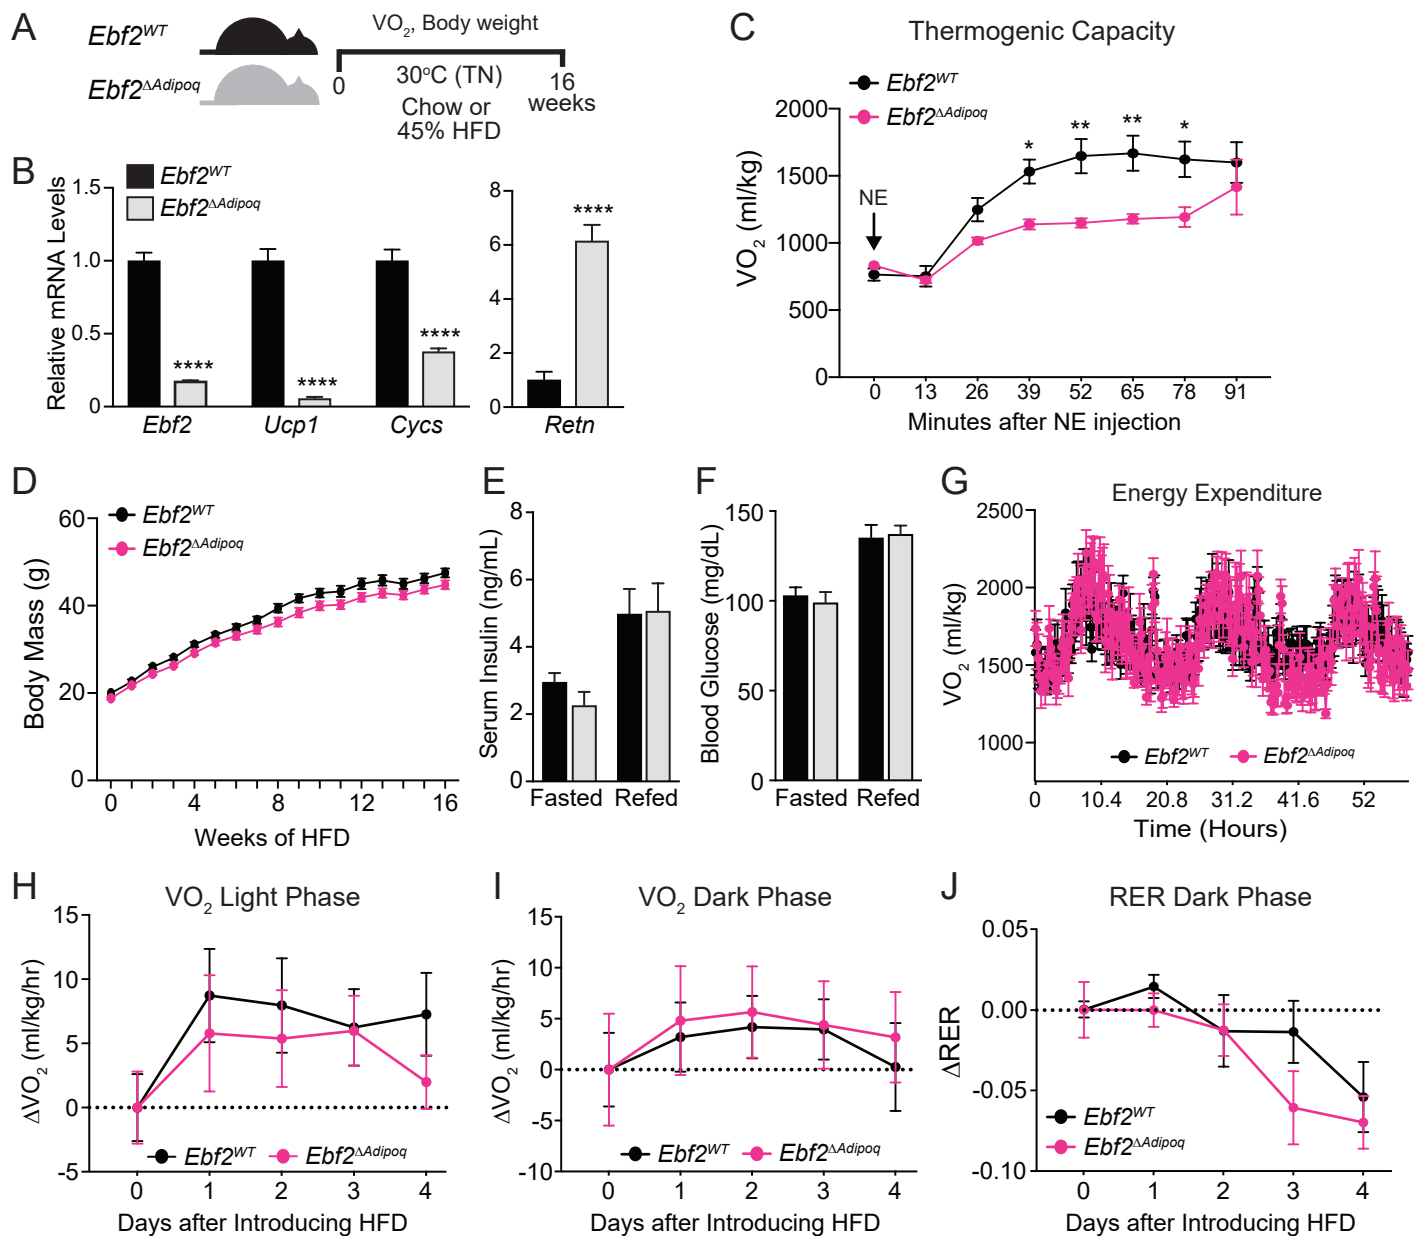

**Figure S3. Adipocyte EBF2 is dispensable for high fat diet-induced thermogenesis (Related to Fig. 2).**

**A)** Experimental Paradigm. Adult *Ebf2*<sup>WT</sup> and *Ebf2*<sup>ΔAdipoq</sup> mice were housed at/near thermoneutrality (TN, 30°C) and fed either normal chow or 45% high fat diet (HFD) for 16 weeks.

**B)** Relative mRNA levels of *Ebf2*, brown fat genes (*Ucp1*, *Cyts*) and the white adipocyte marker *Retn* in BAT from mice in (A). (n=8-13 mice per group; Mean±SEM).

**C)** Oxygen consumption (VO<sub>2</sub>) following norepinephrine (NE) injection in *Ebf2*<sup>WT</sup> and *Ebf2*<sup>ΔAdipoq</sup> mice housed at TN and fed a HFD for 10 weeks (n=6 mice per group; Mean±SEM).

**D)** Body weights of *Ebf2*<sup>WT</sup> (n=11) and *Ebf2*<sup>ΔAdipoq</sup> (n=15) mice during HFD feeding at TN (Mean±SEM).

**E,F)** Blood insulin (E) and glucose (F) levels in *Ebf2*<sup>WT</sup> (n=8) and *Ebf2*<sup>ΔAdipoq</sup> (n=13) mice (fed a HFD for 10 wk) after an overnight fast and following re-feeding for 2 hr (Mean±SEM).

**G)** Basal VO<sub>2</sub> of *Ebf2*<sup>WT</sup> and *Ebf2*<sup>ΔAdipoq</sup> mice following 10 weeks of HFD. (n=6 mice per group; Mean±SEM).

**H,I)** Change in average VO<sub>2</sub> of *Ebf2*<sup>WT</sup> and *Ebf2*<sup>ΔAdipoq</sup> mice in response to introduction of HFD during the light (H) and dark phase (I). (n=6 mice per group; Mean±SEM).

**J)** Change in average respiratory exchange ratio (RER) of *Ebf2*<sup>WT</sup> and *Ebf2*<sup>ΔAdipoq</sup> mice following introduction of HFD (during dark phase) (n=6 mice per group; Mean±SEM).

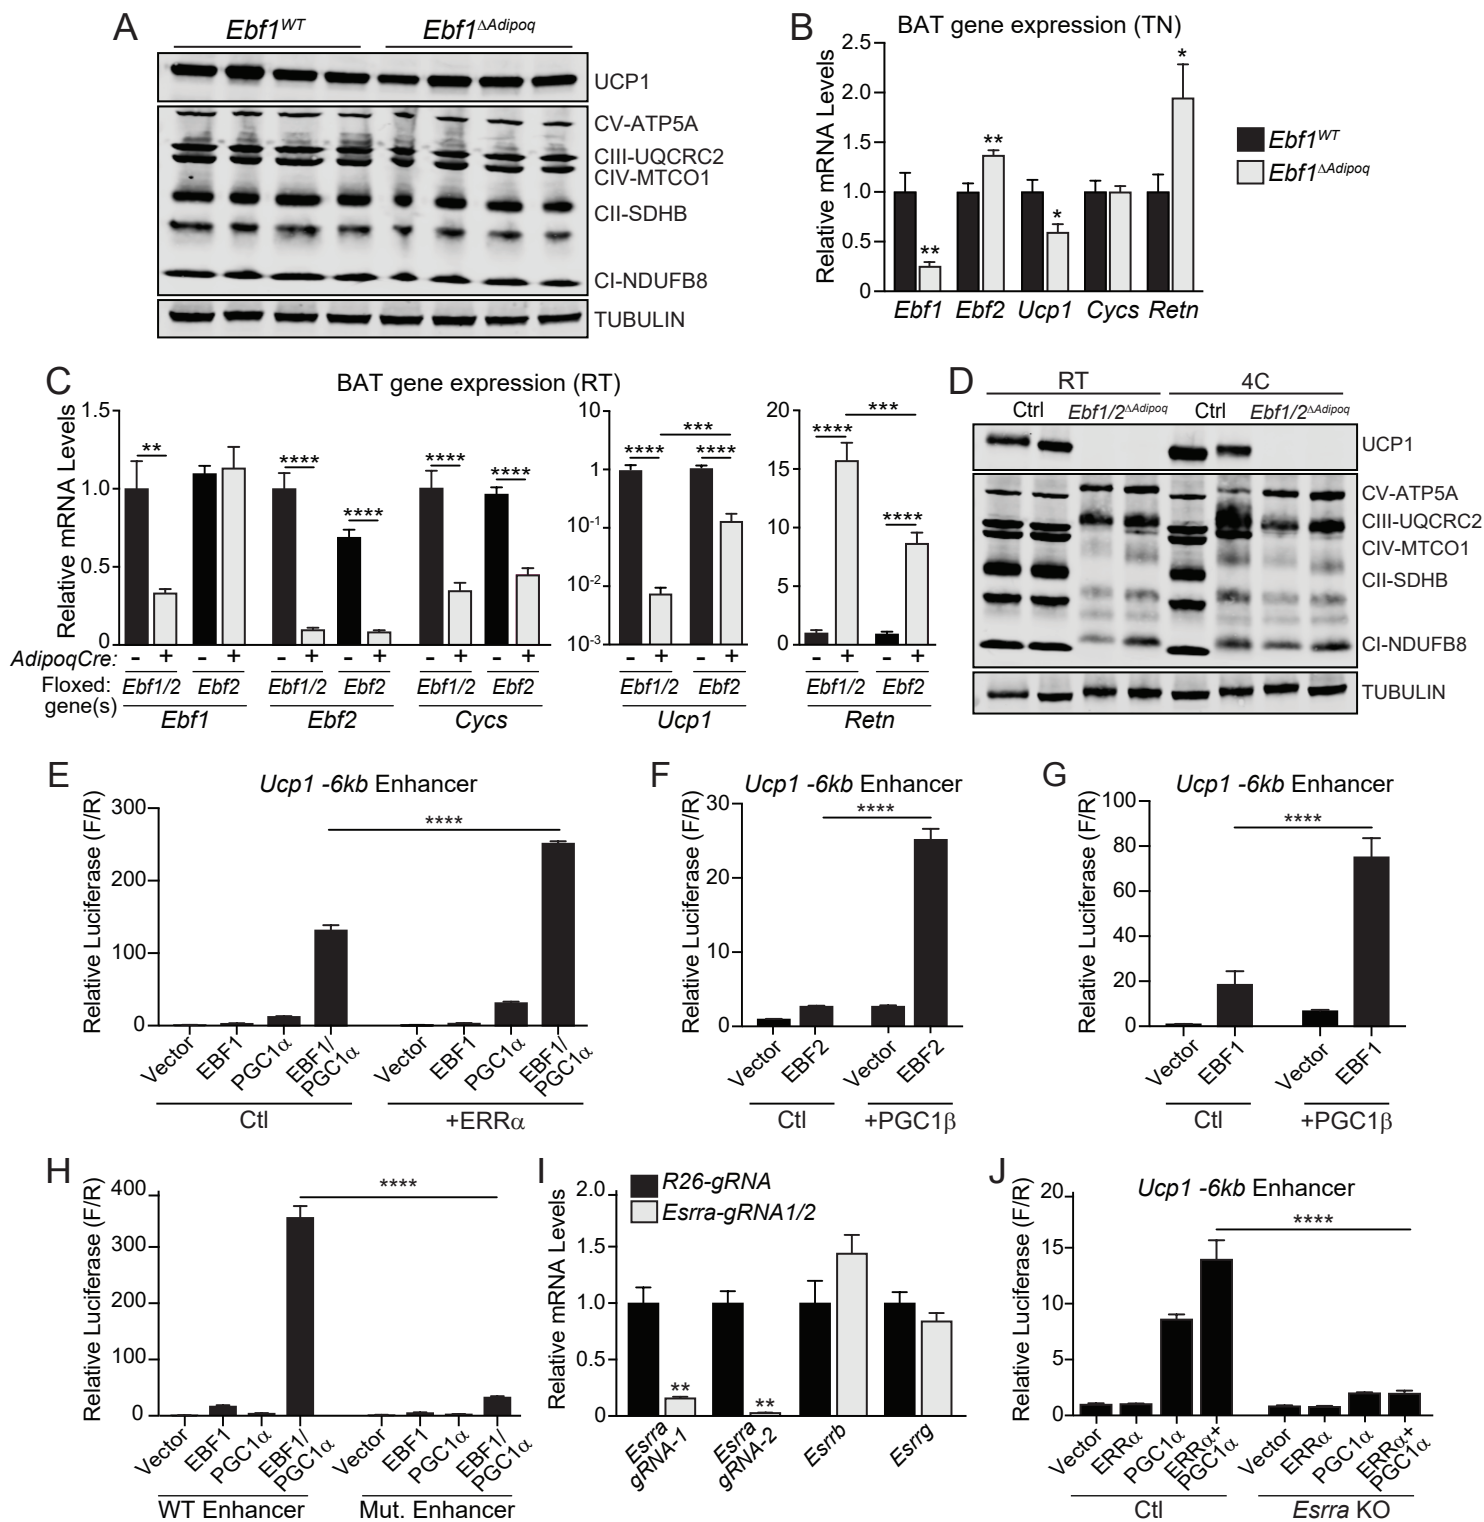

**Figure. S4. EBF1 or EBF2 are required for cold-induced BAT recruitment (Related to Figs 3, 4).**

**A**) Western blot analysis of UCP1 and mitochondrial protein levels in BAT from *Ebf1*<sup>WT</sup> and *Ebf1*<sup>ΔAdipoq</sup> mice at room temperature (RT). **B**) mRNA levels of indicated genes in BAT from *Ebf1*<sup>WT</sup> and *Ebf1*<sup>ΔAdipoq</sup> mice housed at 30°C for 1 month. (n=5 mice per group; Mean±SEM). **C**) mRNA levels of indicated genes in BAT from *Ebf1/2*<sup>WT</sup>, *Ebf1/2*<sup>ΔAdipoq</sup>, *Ebf2*<sup>WT</sup> and *Ebf2*<sup>ΔAdipoq</sup> mice housed at RT (n=3-6 mice per group; Mean±SEM). **D**) Western blot analysis of UCP1 and mitochondrial protein levels in BAT from *Ebf1/2*<sup>WT</sup> and *Ebf1/2*<sup>ΔAdipoq</sup> mice housed at RT or 4°C for 1 wk. **E-G**) Activity of the *Ucp1* -6kb enhancer upon expression of indicated transcription factors. (n=3-6; Mean±SEM). **H**) Activity of the wildtype (WT) or Mutant (Mut) *Ucp1* -6kb enhancer upon expression of EBF1 and PGC1 $\alpha$  (n=3; Mean±SEM). **I**) mRNA levels of *Essra*, *Essrb* and *Essrg* in NIH3T3 cells following deletion of *Esrra* or *Rosa26* (*R26*) as control (Ctl) using a lentiviral Crispr/Cas9 system. Two gRNAs were designed to target *Esrra* and RT-PCR was used to detect the targeted regions of the transcript (gRNA-1 and -2). (n=3; Mean±SEM). **J**) Activity of the *Ucp1* -6kb enhancer in control (Ctl, *R26*-gRNA) and *Essra* knockout (KO) cells upon expression of ERR $\alpha$  and/or PGC1 $\alpha$ . (n=3; Mean±SEM).
